RESEARCH ARTICLE

# Light Intensity Physical Activity and Sedentary Behavior in Relation to Body Mass Index and Grip Strength in Older Adults: Cross-Sectional Findings from the Lifestyle Interventions and Independence for Elders (LIFE) Study

David Bann<sup>1\*</sup>, Don Hire<sup>2</sup>, Todd Manini<sup>3</sup>, Rachel Cooper<sup>1</sup>, Anda Botosaneanu<sup>4</sup>, Mary M. McDermott<sup>5</sup>, Marco Pahor<sup>3</sup>, Nancy W. Glynn<sup>6</sup>, Roger Fielding<sup>7</sup>, Abby C. King<sup>8</sup>, Timothy Church<sup>9</sup>, Walter T. Ambrosius<sup>2</sup>, Thomas Gill<sup>10</sup>, for the LIFE Study Group<sup>†</sup>

**1** MRC Unit for Lifelong Health and Ageing at UCL, London, United Kingdom, **2** Department of Biostatistical Sciences, Division of Public Health Sciences, Wake Forest School of Medicine, Winston-Salem, North Carolina, United States of America, **3** Department of Aging & Geriatric Research, University of Florida, Gainesville, Florida, United States of America, **4** Department of Health Policy Studies and Institute of Gerontology, University of Michigan—Dearborn/Ann Arbor, Ann Arbor, Michigan, United States of America, **5** Northwestern University, Feinberg School of Medicine, Chicago, United States of America, **6** Department of Epidemiology, University of Pittsburgh, Pittsburgh, United States of America, **7** Nutrition, Exercise Physiology, and Sarcopenia Laboratory, Jean Mayer USDA Human Nutrition Research Center on Aging at Tufts University, Boston, MA, United States of America, **8** Stanford University School of Medicine, Stanford, CA, United States of America, **9** Pennington Biomedical Research Center, Baton Rouge, Louisiana, United States of America, **10** Yale School of Medicine, New Haven, Connecticut, United States of America

<sup>†</sup> Membership of the LIFE Study Group is listed in [S2 Appendix](#).

\* [david.bann@ucl.ac.uk](mailto:david.bann@ucl.ac.uk)

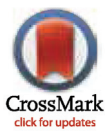

**OPEN ACCESS**

**Citation:** Bann D, Hire D, Manini T, Cooper R, Botosaneanu A, McDermott MM, et al. (2015) Light Intensity Physical Activity and Sedentary Behavior in Relation to Body Mass Index and Grip Strength in Older Adults: Cross-Sectional Findings from the Lifestyle Interventions and Independence for Elders (LIFE) Study. *PLoS ONE* 10(2): e0116058. doi:10.1371/journal.pone.0116058

**Academic Editor:** Gregory Tranah, San Francisco Coordinating Center, UNITED STATES

**Received:** July 8, 2014

**Accepted:** December 1, 2014

**Published:** February 3, 2015

**Copyright:** This is an open access article, free of all copyright, and may be freely reproduced, distributed, transmitted, modified, built upon, or otherwise used by anyone for any lawful purpose. The work is made available under the [Creative Commons CC0](#) public domain dedication.

**Data Availability Statement:** Data are from the LIFE study ([clinicaltrials.gov](http://clinicaltrials.gov) Identifier: NCT01072500). Due to ethical and legal restrictions, data are available upon request from the LIFE Study Administrative Coordinating Center ([LIFEACC@aging.ufl.edu](mailto:LIFEACC@aging.ufl.edu)). Further information on data access is available from <https://www.thelifestudy.org>

**Funding:** DB and RC are supported by the Medical Research Council (UK) (grant codes MC\_UU\_12019/1

## Abstract

### Background

Identifying modifiable determinants of fat mass and muscle strength in older adults is important given their impact on physical functioning and health. Light intensity physical activity and sedentary behavior are potential determinants, but their relations to these outcomes are poorly understood. We evaluated associations of light intensity physical activity and sedentary time—assessed both objectively and by self-report—with body mass index (BMI) and grip strength in a large sample of older adults.

### Methods

We used cross-sectional baseline data from 1130 participants of the Lifestyle Interventions and Independence for Elders (LIFE) study, a community-dwelling sample of relatively sedentary older adults (70–89 years) at heightened risk of mobility disability. Time spent sedentary and in light intensity activity were assessed using an accelerometer worn for 3–7 days

and MC\_UU\_12019/4). DB received an MRC Centenary Early Career Award to facilitate this work. The Lifestyle Interventions and Independence for Elders Study is funded by a National Institutes of Health/National Institute on Aging Cooperative Agreement #U01AG22376 and a supplement from the National Heart, Lung and Blood Institute 3U01AG022376-05A2S, and sponsored in part by the Intramural Research Program, National Institute on Aging, NIH. The research is partially supported by the Claude D. Pepper Older Americans Independence Centers at the University of Florida (1 P30 AG028740), Wake Forest University (1 P30 AG21332), Tufts University (1P30AG031679), University of Pittsburgh (P30 AG024827), and Yale University (P30AG021342) and the NIH/NCRR CTSA at Stanford University (UL1 RR025744), Tufts University is also supported by the Boston Rehabilitation Outcomes Center (1R24HD065688-01A1). LIFE investigators are also partially supported by the following: Dr. Thomas Gill (Yale University) is the recipient of an Academic Leadership Award (K07AG3587) from the National Institute on Aging. Dr. Roger Fielding (Tufts University) is partially supported by the U.S. Department of Agriculture, under agreement No. 58-1950-0-014. The funders had no role in study design, data collection and analysis, decision to publish, or preparation of the manuscript.

**Competing Interests:** The authors have declared that no competing interests exist.

(Actigraph GT3X) and by self-report. Associations between these exposures and measured BMI and grip strength were evaluated using linear regression.

## Results

Greater time spent in light intensity activity and lower sedentary times were both associated with lower BMI. This was evident using objective measures of lower-light intensity, and both objective and self-reported measures of higher-light intensity activity. Time spent watching television was positively associated with BMI, while reading and computer use were not. Greater time spent in higher but not lower intensities of light activity (assessed objectively) was associated with greater grip strength in men but not women, while neither objectively assessed nor self-reported sedentary time was associated with grip strength.

## Conclusions

In this cross-sectional study, greater time spent in light intensity activity and lower sedentary times were associated with lower BMI. These results are consistent with the hypothesis that replacing sedentary activities with light intensity activities could lead to lower BMI levels and obesity prevalence among the population of older adults. However, longitudinal and experimental studies are needed to strengthen causal inferences.

## Background

Obesity is highly prevalent and is associated with impaired physical functioning,<sup>[1,2]</sup> morbidity, and premature mortality.<sup>[3]</sup> In addition, low muscle strength is associated with greater physical impairment<sup>[1,4]</sup> and higher mortality rates.<sup>[5]</sup> Obesity and low muscle strength have been found to commonly co-occur among older adults—this syndrome, sometimes referred to as dynapenic obesity, has been associated with even higher risk of impaired functioning and disability than either obesity or muscle weakness alone.<sup>[6–8]</sup> Fat mass and muscle strength are therefore two important outcomes that may independently or synergistically affect physical functioning and health.<sup>[9]</sup> As such, there is a need to identify factors that are associated with measures of fat mass and muscle strength, especially those that may be modifiable such as physical activity and sedentary behaviours.

Intervention studies of older adults have found that moderate to vigorous intensity exercise leads to short-term losses in weight,<sup>[10–12]</sup> and resistance exercise results in increased muscle strength.<sup>[13]</sup> Observational studies can add complementary information on how free-living activities of lower intensities (including non-volitional activities) relate to fat mass and muscle strength, although few have been conducted in older adults. While some studies have found that higher physical activity is associated with lower fat mass<sup>[14]</sup> or body mass index (BMI) and stronger grip in older adults,<sup>[15–17]</sup> others have produced equivocal findings.<sup>[18–21]</sup> For example, in a large European study (N = 288,498), higher self-reported physical activity was associated with lower weight gain in older women but not older men.<sup>[20]</sup> Most existing studies have used self-reported measures of total or moderate to vigorous physical activity and have not examined light intensity activity, which older adults frequently undertake but find difficult to recall.<sup>[22,23]</sup> Light intensity activities, such as leisurely walking or light housework, contribute to energy expenditure<sup>[24]</sup> and may therefore contribute to lowering fat mass levels by improving energy balance (the ratio of energy expenditure to intake). Light intensity activities are

likely to be especially important among older adults as they are at greater risk of falls and health-related problems, which may preclude participation in activities of higher intensity.

Increasingly, sedentary behavior has been associated with a wide range of health outcomes independent of physical activity level.[25,26] Greater sedentary time has also been related to indicators of higher fat mass in some[14,27] but not all studies,[28] and to weaker grip strength.[29] Most studies, however, have used only self-reported measures of sedentary time and few have been conducted in older adults. As older adults typically spend substantial proportions of their day sedentary (~60% of waking hours),[30] it is important to understand how sedentary time relates to indicators of fat mass and muscle strength. As the effect of sedentary time on outcomes may differ by the type of sedentary behavior undertaken (eg, television viewing vs computer use[29]), analyzing different types of behavior may be useful to help identify the most relevant intervention targets.

The objective of this study was to evaluate the associations of sedentary time and light intensity physical activity with BMI and grip strength among older men and women using baseline data from the Lifestyle Interventions and Independence for Elders (LIFE) Study. This study benefits from the availability of measures of both objectively assessed and self-reported data on physical activity and sedentary behavior in older adults.

## Methods

### Study population

The LIFE Study is a Phase 3 randomized clinical trial, conducted at 8 field centers in 8 US states, that is designed to compare a long-term physical activity program with a health education program on the incidence of major mobility disability ([clinicaltrials.gov](http://clinicaltrials.gov) Identifier: NCT01072500). The rationale, design, and methods of the LIFE Study have been presented in detail elsewhere,[31] as have baseline characteristics.[32] Participants aged 70–89 years were eligible if they were at heightened risk of mobility disability (i.e., a Short Physical Performance Battery score  $\leq 9$ ), yet were able to walk 400m in 15 minutes without sitting, leaning, or assistance from a walker or another person. Participants were additionally required to be relatively sedentary (i.e., reported  $< 20$  mins/week in the past month getting regular physical activity and  $\leq 125$  mins/week of moderate to vigorous activity). In total, 1635 participants (~67% women) were enrolled—ranging from 200 to 216 per site. The study was given ethical approval by the institutional review boards at all participating sites (University of Florida, Northwestern University, Pennington Biomedical Research Center, University of Pittsburgh, Stanford University, Tufts University, Wake Forest University, and Yale University), and written informed consent was obtained from all study participants.

### Body mass index and grip strength assessment

Weight, height, and waist circumference were measured by research staff using a standard protocol, and BMI ( $\text{kg}/\text{m}^2$ ) was derived. Hand grip strength (kg) was assessed twice consecutively in the dominant arm using a handheld Jamar dynamometer, or in the non-dominant hand if participants reported surgery or a current flare-up of pain in the dominant hand/wrist in the past 3 months ( $N = 46$ ). The maximum value was used in analyses.

### Physical activity and sedentary behavior measures

**Objectively assessed measures.** Participants were asked to wear an accelerometer (Actigraph GT3X) on their hip for seven consecutive days except during sleep, showering/bathing, and swimming. Movement was captured along the vertical axis in 1-minute epochs, and non-wear

time was defined as 90 minutes of consecutive zero counts as described by Choi and colleagues. [33] In total, 1296 participants had valid baseline accelerometer data. Missing participant data were largely due to technical or procedural difficulties during the data collection phase. All analyses were constrained to participants who wore the device for 600 minutes per day for three or more days (34 participants were excluded due to low wear time); the total analytic sample (excluding participants with missing covariate or outcome data) was 1193 for BMI, and 1130 for grip strength (73% and 69% of the baseline sample, respectively).

A measure of total physical activity was derived by calculating the daily average number of counts per minute. This has been shown to be positively correlated with physical activity energy expenditure assessed using oxygen consumption in older adults. [34] In the absence of well-accepted, evidence-based cut-points for sedentary behavior and physical activity intensity in older adults, [35] cut-points were chosen that demarcate sedentary time (<100 counts/minute) and time spent in light intensity activity. As previously described, light intensity activity was categorized as time spent in lower-light (100–1040 counts/minute) and higher-light activity (1041–1951 counts/minute), as evidence suggests that spending more time in higher-light activity may be particularly beneficial for health outcomes in older adults. [34,36] Time spent in moderate to vigorous activity was not used as a main exposure as it was expected that screening of the LIFE Study sample [31] would result in low levels of and little variation in moderate to vigorous activity. Data for all categories were expressed in minutes or hours/day, and all data were adjusted for wear time by its inclusion as a covariate in models.

**Self-reported measures.** During the baseline assessment, participants completed the Community Healthy Activities Model Program for Seniors physical activity questionnaire (CHAMPS). [37] This instrument measured the time spent undertaking 41 domestic and leisure time activities in a typical week during the past 4 weeks. Activities were grouped according to the estimated energy cost of each activity—i.e., time spent sedentary ( $\leq 1.5$  metabolic equivalents [METs]), [38] and in lower-light ( $> 1.5$ – $2$  METs) and higher-light intensity activity ( $> 2$  METs). [24] As previously described, [39] where CHAMPS items comprised multiple activities, an average MET value was assigned. The questionnaire items used in each category are shown in [S1 Appendix](#). Three separate components of sedentary time which were expected to be commonly undertaken in old age (television viewing, computer use, and reading) were also used as separate exposures in analyses to examine whether they were differentially associated with BMI and grip strength. All self-reported measures were converted so that resulting regression coefficients showed the change in outcome per hour/day increase in activity.

## Potential confounders

The following factors were considered as potential confounders because they have previously been shown to be associated with both the exposures and outcomes of interest: age, sex, ethnicity, education, clinical site, smoking, alcohol consumption, number of chronic conditions (congestive heart failure, myocardial infarction/angina, peripheral arterial disease, stroke, cancer), history of arthritis or rheumatism, and self-rated health.

## Analytical strategy

Descriptive statistics (mean (SD) or N (%)) were calculated by gender; t-tests or chi-square tests were used to compare genders. Separate linear regression models were used to examine the relations of physical activity and sedentary behavior (assessed using accelerometry and CHAMPS) with BMI and grip strength. As previous studies have found sex differences in associations with BMI or grip strength, [20,40] models included sex as a covariate and a formal test of the interaction with sex was performed. Where sex differences were found ( $P < .05$  for

interaction term), the relations were estimated separately in men and women. In addition to the model adjusting only for sex, we also adjusted for other potential confounders. Finally, we examined whether the associations between physical activity (and sedentary behavior) and grip strength differed by BMI group (<30 kg/m<sup>2</sup> vs. ≥ 30) by including physical activity and BMI group interaction terms. No explicit adjustment for multiplicity was made in these analyses.

## Results

### Descriptive statistics

BMI was not significantly different between men and women, while men had stronger grip than women (Table 1). For both self-reported and accelerometry-based physical activity measures, men and women spent the majority of time sedentary, followed by time in lower and then higher-light intensity physical activity. As expected, a small fraction of time was spent in moderate to vigorous intensity activity (approximately 4 minutes/day in men, and 2.5 minutes/day in women when assessed via accelerometry). Women spent more time sedentary than men, and less time physically active. The most prevalent activity types in each intensity category were watching television (sedentary), visiting with friends (lower-light intensity activity), and undertaking light house work (higher-light intensity activity; shown in S1 Table).

### Physical activity and sedentary behavior in relation to BMI

Using accelerometry, higher total physical activity was associated with lower BMI (Table 2). Less time spent sedentary and greater time spent in both low and higher-light intensity activities were associated with lower BMI. The magnitude of these associations was generally

**Table 1. Descriptive statistics of the Lifestyle Interventions and Independence for Elders (LIFE) Study sample at baseline, by sex (n = 1130).**

|                                      | Men           | Women         | P*    |
|--------------------------------------|---------------|---------------|-------|
| Age (years)                          | 79.3 (5.3)    | 78.5 (5.3)    | .008  |
| Race (% non-white)                   | 56 (13.4)     | 243 (28.7)    | <.001 |
| Weight (kg)                          | 91.3 (18.9)   | 77.7 (17.2)   | <.001 |
| Height (cm)                          | 174.1 (7.3)   | 159.9 (6.8)   | <.001 |
| Body mass index (kg/m <sup>2</sup> ) | 30.1 (5.5)    | 30.3 (6.3)    | .414  |
| Grip strength (kg)                   | 31.7 (10.2)   | 19.9 (6.3)    | <.001 |
| CHAMPS measures (self-report)        |               |               |       |
| Total physical activity (min/day)    | 125.6 (75.2)  | 143.4 (80.1)  | <.001 |
| Sedentary time (min/day)             | 197.5 (60.9)  | 184.6 (62.1)  | <.001 |
| Lower-light intensity (min/day)      | 49.1 (39.2)   | 63.3 (45.1)   | <.001 |
| Higher-light intensity (min/day)     | 67.9 (51.9)   | 74.1 (53.9)   | .050  |
| Accelerometry measures               |               |               |       |
| Total physical activity (min/day)    | 168.7 (67.0)  | 202.0 (67.9)  | <.001 |
| Sedentary time (min/day)             | 663.1 (109.6) | 634.3 (114.7) | <.001 |
| Lower-light intensity (min/day)      | 152.6 (55.7)  | 187.5 (59.0)  | <.001 |
| Higher-light intensity (min/day)     | 12.1 (13.1)   | 12.1 (11.6)   | .950  |

Note: Results are presented as mean (SD) or as n (%);

\*Comparison of sexes using t-tests or chi-squared tests; all accelerometry measures were adjusted for wear time; accelerometer cut points were as follows: sedentary time <100 counts/min; lower-light intensity: 100–1040 counts/min; Higher-light intensity: ≥1041 counts/min.

doi:10.1371/journal.pone.0116058.t001

**Table 2. Mean differences in body mass index (kg/m<sup>2</sup>) per unit increase in physical activity and sedentary time.**

|                                          | Minimally adjusted*<br>β (95% CI) | P     | Fully adjusted**<br>β (95% CI) | P    | Sex Interaction P-value |
|------------------------------------------|-----------------------------------|-------|--------------------------------|------|-------------------------|
| Accelerometry measures (n = 1193)        |                                   |       |                                |      |                         |
| Total physical activity (hr/day)         | -0.12(-0.19,-0.06)                | <.001 | -0.11(-0.17,-0.04)             | .003 | .196                    |
| Sedentary time (hr/day)                  | 0.42(0.13,0.71)                   | .005  | 0.44(0.14,0.74)                | .004 | .822                    |
| Lower-light intensity (hr/day)           | -0.40(-0.74,-0.06)                | .020  | -0.46(-0.81,-0.12)             | .009 | .052                    |
| Higher-light intensity (hr/day)          | -1.61(-3.20,-0.02)                | .047  | -1.19(-2.80,0.42)              | .147 | .326                    |
| CHAMPS self-reported measures (n = 1193) |                                   |       |                                |      |                         |
| Total physical activity (hr/day)         | -0.65(-1.00,-0.30)                | <.001 | -0.59(-0.96,-0.23)             | .001 | .942                    |
| Sedentary time (hr/day)                  | 0.37(0.06,0.67)                   | .018  | 0.51(0.19,0.82)                | .002 | .531                    |
| Lower-light intensity (hr/day)           | 0.51(0.08,0.95)                   | .019  | 0.52(0.08,0.96)                | .021 | .121                    |
| Higher-light intensity (hr/day)          | -0.46(-0.81,-0.11)                | .010  | -0.40(-0.76,-0.03)             | .032 | .617                    |

\*Adjusted for age, sex, and total wear time in hours (accelerometer measures only);

\*\*Additionally adjusted for race, alcohol intake, smoking, education, diabetes, clinical site, comorbidity, history of arthritis or rheumatism, self-reported health;

<sup>a</sup>sex-specific coefficients: β (95% CI): -2.16(-3.79,-0.54) in men, -1.11(-2.77,0.55) in women.

accelerometer cut points were as follows: sedentary time <100 counts/min; lower-light intensity: 100–1040 counts/min; Higher-light intensity: 1041–1951 counts/min.

doi:10.1371/journal.pone.0116058.t002

modest: for example, in the fully adjusted model, a 1-hour increment in lower-light intensity activity was associated with a 0.46kg/m<sup>2</sup> (~1.5%) lower BMI.

Higher self-reported total physical activity was also associated with lower BMI. Less time spent sedentary and more time spent in higher-light intensity activity were associated with lower BMI. In contrast, more time spent in lower-light intensity activity was associated with higher BMI. The positive association between total sedentary time and BMI was driven by television viewing; reading and computer use were not associated with BMI (S2 Table).

These patterns of association were similar in minimally and fully adjusted models (Table 2), although the inverse association between objectively assessed higher-light intensity activity and BMI was weaker in fully adjusted models and 95% confidence intervals overlapped the null. While there was no evidence for sex differences in associations (p for interaction term >0.05), there was some evidence that the inverse association between objectively assessed lower-light intensity activity and BMI was stronger in men than women (p for interaction term = 0.052). Associations between these exposures and waist circumference were similar to those with BMI (S3 Table).

### Physical activity and sedentary behavior in relation to grip strength

Using accelerometry, total physical activity was differentially associated with grip strength in men and women (p interaction term = .006; Table 3), with no association found in women and a positive association found in men. Sedentary and lower-light intensity activity time were not associated with grip strength, while greater time spent in higher-light intensity activity was associated with greater grip strength in men but not women (p interaction term = 0.002): a 1 hour increment in higher-light intensity physical activity was associated with a 6kg (~19%) higher grip strength among men. This association was similar after adjustment for BMI and other potential confounders. There was also no evidence that the association differed across BMI groups (p>0.1 for all physical activity by BMI group interactions). Using self-reported

**Table 3. Mean differences in grip strength (kg) per unit increase in physical activity and sedentary time.**

|                                         | Minimally adjusted*<br>β (95% CI) | P    | Fully adjusted**<br>β (95% CI) | P     | Sex Interaction P-value |
|-----------------------------------------|-----------------------------------|------|--------------------------------|-------|-------------------------|
| Accelerometry measures (n = 1130)       |                                   |      |                                |       |                         |
| Total physical activity (hr/day)        | 0.06(-0.03,0.16)                  | .191 | 0.09(-0.01,0.18)               | .075  | .006                    |
| Total physical activity, men            | 0.14(-0.05,0.33)                  | .138 | 0.21(0.02,0.41)                | .035  |                         |
| Total physical activity, women          | 0.01(-0.09,0.11)                  | .897 | 0.01(-0.08,0.11)               | .767  |                         |
| Sedentary time (hr/day)                 | -0.13(-0.55,0.28)                 | .527 | -0.22(-0.64,0.19)              | .290  | .905                    |
| Lower-light intensity (hr/day)          | 0.06(-0.42,0.54)                  | .809 | 0.16(-0.32,0.64)               | .516  | .140                    |
| Higher-light intensity (hr/day)         | 2.41(0.16,4.66)                   | .036 | 2.49(0.28,4.71)                | .027  | .002                    |
| Higher-light intensity, men             | 5.53(0.89,10.16)                  | .020 | 6.05(1.44,10.65)               | .010  |                         |
| Higher-light intensity, women           | 0.50(-1.85,2.86)                  | .675 | 0.49(-1.78,2.77)               | .669  |                         |
| CHAMPS self-reported measures(n = 1130) |                                   |      |                                |       |                         |
| Total physical activity (hr/day)        | -0.12(-0.62,0.39)                 | .650 | -0.29(-0.80,0.21)              | 0.255 | 0.215                   |
| Sedentary time (hr/day)                 | 0.10(-0.33,0.53)                  | .640 | 0.17(-0.27,0.60)               | 0.445 | 0.224                   |
| Lower-light intensity (hr/day)          | 0.02(-0.60,0.63)                  | .958 | 0.01(-0.60,0.62)               | 0.983 | 0.333                   |
| Higher-light intensity (hr/day)         | -0.26(-0.76,0.23)                 | .298 | -0.39(-0.88,0.11)              | 0.127 | 0.180                   |

\*adjusted for age, sex, total wear time in hours (accelerometer measures only).

\*\*additionally adjusted for height, body mass index, race, alcohol intake, smoking, education, diabetes, clinical site, comorbidity, history of arthritis or rheumatism, self-rated health.

accelerometer cut points were as follows: sedentary time <100 counts/min; lower-light intensity: 100–1040 counts/min; Higher-light intensity: 1041–1951 counts/min.

doi:10.1371/journal.pone.0116058.t003

information, total physical activity, low and higher-light intensity activity, and total sedentary time were not associated with grip strength (Table 3).

## Discussion

### Main findings

In cross-sectional analysis of relatively sedentary older adults at heightened risk of mobility disability, higher-light intensity physical activity and less sedentary time were associated with lower BMI. These associations were found using both self-reported and objectively assessed measures of physical activity and sedentary time. In contrast, greater time spent in higher-light activity (assessed objectively) was associated with greater grip strength in men (independent of BMI) but not women, while sedentary time was not associated with grip strength.

These results add to previous studies examining how self-reported physical activity and sedentary time relate to BMI (or weight) and grip strength in older adults. [15–17,20] Results from this study extend previous findings by using both objective and self-reported measures, and by explicitly investigating light intensity activity.

### Explanation of results

BMI is highly correlated with directly measured fat mass in older adults (e.g.,  $r = 0.7$  [41]), and so associations with BMI are likely to be driven by fat mass. In support of this, patterns of association with waist circumference (which excludes appendicular muscle mass) were similar. The association between higher physical activity and lower BMI is consistent with the theory that fat mass levels are governed by energy balance: even light intensities of physical activity may contribute to lower energy balance, and in turn to lower BMI. Consistent with this, when using

accelerometry, the magnitude of association was larger for higher-light than lower-light intensity activity. Associations with total and higher-light activity were found using both objective and self-reported activity, suggesting that both ranked participants similarly according to activity level. However, lower-light intensity activity was inversely associated with BMI when using accelerometry but not self-reported activity. This may be explained by the imprecise classification of self-reported activity intensities—those grouped as lower-light intensity activities in CHAMPS include potentially sedentary components (e.g., “visiting friends or family”), which could lead to misclassification. This is supported by the positive correlation between sedentary and lower-light time (partial  $r$  (as per [Table 2](#)) = .21) and a study which found that lower-light intensity activity derived from CHAMPS was only weakly related to a comparable accelerometry-assessed measure.[\[39\]](#)

The association between greater sedentary time and higher BMI is likely to be partly or wholly explained by more sedentary participants spending less time in light intensity activity—such that each hour increase in time spent sedentary reflects an hour decrease in time spent physically active. Sedentary time was inversely correlated with total physical activity (partial  $r$  (as per [Table 2](#)) = -0.88). Because of this, when using accelerometry data we were unable to determine whether sedentary time was associated with outcomes independent of physical activity time, due to the occurrence of multicollinearity in fully adjusted models. If the detrimental effects of food-related television advertisements on obesity in children[\[42\]](#) extend to older adults, the positive associations between sedentary time and BMI could also be explained, at least in part, by dietary factors.

The magnitude of associations between physical activity and BMI were generally similar in men and women. While it has been suggested that women may be less responsive to the effects of physical activity on weight,[\[43,44\]](#) recent experimental studies in young adults, which have either measured or controlled for energy expenditure, have found no sex differences in weight loss response to exercise.[\[45,46\]](#)

Associations between higher physical activity and stronger grip were only found for higher-light intensity activity when measured by accelerometry in men. It is possible that men may have more frequently taken part in the types of activities that benefited upper extremity muscle strength than women, as suggested in other studies.[\[40\]](#) Given the sedentary nature of the cohort, these activities are unlikely to be resistance exercises,[\[13\]](#) but rather domestic and leisure activities that result in both load bearing of the muscle and movement along the vertical axis. Consistent with this, aerobically active adults have been found to have greater muscle strength than their less active age-matched counter-parts,[\[47\]](#) and a number of experimental studies have found that aerobic exercise training can lead to skeletal muscle hypertrophy.[\[48\]](#) The lack of association between self-reported physical activity and grip strength could suggest that the items used did not fully capture the types of activities affecting muscle strength or that the activities leading to greater muscle strength were not undertaken by participants of this study. The larger random measurement error expected in self-reported activity would also drive the associations towards the null.[\[49\]](#)

## Strengths and limitations

Strengths of this study include the use of a large sample of older men and women at heightened risk of mobility disability that have been rarely studied, and the inclusion of both self-reported and objectively assessed measures of light intensity physical activity and sedentary time. The self-reported measures captured information on the types of activities undertaken, while the objective measures may have provided more accurate assessment of light intensity physical activity and sedentary time volumes.



Limitations of the current study include the cross-sectional observational design, which provides limited evidence with which to make causal inferences. While we hypothesized that physical activity and sedentary behavior would be associated with BMI and grip strength, associations are likely to be bi-directional in nature, as high BMI and low muscle strength may lead to lower physical activity participation. The sedentary nature of the LIFE cohort precluded the investigation of moderate to vigorous intensity physical activity, although there was sufficient variation in activity levels to investigate associations with time spent sedentary and in light intensity of activity. The use of BMI as an indicator of fat mass may have led us to underestimate the associations with physical activity, as physical activity may be positively associated with lean mass.[14,50] The accelerometer did not distinguish between different postures (i.e., standing, sitting, or lying), and time spent in each could impact differently on fat mass and muscle strength. While a recent consensus definition of sedentary behavior specifies that it is behavior undertaken while sitting,[38] laying down or reclining also result in low energy expenditure,[51] and daytime lying (e.g., napping or reclining) is a prevalent form of sedentary behavior among older adults.[52]

## Implications

In this cross-sectional study, greater time spent in light intensity activity and lower sedentary time were both associated with lower BMI. These findings are consistent with the hypothesis that replacing some of the highly prevalent sedentary time[30] with light intensity physical activity might lead to lower BMI levels and therefore obesity prevalence among older adults; however, longitudinal and experimental studies are needed to strengthen causal inferences. Our findings support future intervention studies designed to reduce television viewing time to reduce BMI, replacing television viewing with light intensity activities such as leisurely walking. Further studies could also provide additional information on the benefits of different types of activity: activities which benefit both fat mass and muscle strength may be particularly beneficial, given their independent or synergistic effects on health and physical functioning. We found, for example, that greater time spent in higher-light intensity activities was associated with both lower BMI and stronger grip strength in men, and that the association with grip strength was independent of and not modified by BMI. This suggests that this intensity of activity was associated with lower risk of obesity and low grip strength (ie, dynapenic obesity)—however, other cohorts may be more suited to examine associations specifically with dynapenic obesity, as most participants in the LIFE cohort were obese according to BMI. Given logistical difficulties in recruiting older adults into behavioral physical activity interventions, and low rates, in general, of long-term post-intervention improvements in physical activity,[53] multiple interventions may be required at both the individual and societal levels to increase population physical activity levels.

The results from this study also support the use of self-reported measures of sedentary behavior and physical activity in older adults, given their correlation with BMI, a finding that was also observed using objective measures. Further work is needed to derive valid and reliable measures of lower-light intensity activity among older adults.[39]

## Conclusions

In a sample of sedentary older adults at risk of mobility disability, higher-light intensity physical activity was cross-sectionally associated with lower BMI, and more time spent sedentary was associated with higher BMI. In contrast, higher-light intensity activity was differentially associated with grip strength in men and women (positively associated among men when assessed using accelerometry only), while self-reported measures were not associated with grip

strength. These results are consistent with the hypothesis that replacing highly prevalent sedentary activities, especially television viewing, with light intensity physical activities such as leisurely walking could lead to lower BMI levels and therefore obesity prevalence among the population of older adults. Further longitudinal and experimental studies are required to confirm these findings and identify interventions to reduce BMI and improve grip strength.

## Supporting Information

**S1 Appendix. Questionnaire items used to classify time spent per week sedentary, or in low- to higher-light intensity physical activity from the shortened version of the Community Health Activities Model Program for Seniors physical activity questionnaire (CHAMPS).** (DOCX)

**S2 Appendix. Research Investigators for the LIFE Study.** (DOCX)

**S1 Table. Frequency of participation in sedentary behaviors and physical activities assessed using the Community Health Activities Model Program for Seniors physical activity questionnaire.** (DOCX)

**S2 Table. Mean differences in body mass index ( $\text{kg}/\text{m}^2$ ) per hour/day increase in self-reported sedentary behaviors (n = 1193).** (DOCX)

**S3 Table. Mean differences in waist circumference (cm) per unit increase in physical activity and sedentary time.** (DOCX)

## Author Contributions

Conceived and designed the experiments: DB TG RC DH WTA AB TM. Analyzed the data: DH WTA. Wrote the paper: DB TG. Contributed to the critical revision of manuscript drafts: DB DH TM RC AB MMM MP NWG RF ACK TC WTA TG. Interpreted the data: DB DH TM RC AB MMM MP NWG RF ACK TC WTA TG. Approved the final version: DB DH TM RC AB MMM MP NWG RF ACK TC WTA TG. Contributed to the acquisition of data: TM MMM MP NWG RF ACK TC WTA TG. Developed analytic plans: DB TG RC DH WTA AB TM.

## References

1. Schaap LA, Koster A, Visser M (2013) Adiposity, Muscle Mass, and Muscle Strength in Relation to Functional Decline in Older Persons. *Epidemiol Rev* 35: 51–65.
2. Vincent HK, Vincent KR, Lamb KM (2010) Obesity and mobility disability in the older adult. *Obesity Reviews* 11: 568–579. doi: [10.1111/j.1467-789X.2009.00703.x](https://doi.org/10.1111/j.1467-789X.2009.00703.x) PMID: [20059707](https://pubmed.ncbi.nlm.nih.gov/20059707/)
3. Flegal KM, Kit BK, Orpana H, Graubard BI (2013) Association of all-cause mortality with overweight and obesity using standard body mass index categories: A systematic review and meta-analysis. *JAMA* 309: 71–82. doi: [10.1001/jama.2012.113905](https://doi.org/10.1001/jama.2012.113905) PMID: [23280227](https://pubmed.ncbi.nlm.nih.gov/23280227/)
4. den Ouden MEM, Schuurmans MJ, Arts IEMA, van der Schouw YT (2011) Physical performance characteristics related to disability in older persons: A systematic review. *Maturitas* 69: 208–219. doi: [10.1016/j.maturitas.2011.04.008](https://doi.org/10.1016/j.maturitas.2011.04.008) PMID: [21596497](https://pubmed.ncbi.nlm.nih.gov/21596497/)
5. Cooper R, Kuh D, Hardy R (2010) Objectively measured physical capability levels and mortality: systematic review and meta-analysis. *BMJ* 341: c4467. doi: [10.1136/bmj.c4467](https://doi.org/10.1136/bmj.c4467) PMID: [20829298](https://pubmed.ncbi.nlm.nih.gov/20829298/)

6. Bouchard DR, Janssen I (2010) Dynapenic-Obesity and Physical Function in Older Adults. *Journals of Gerontology Series A-Biological Sciences and Medical Sciences* 65: 71–77. doi: [10.1093/gerona/glp159](https://doi.org/10.1093/gerona/glp159) PMID: [19887536](https://pubmed.ncbi.nlm.nih.gov/19887536/)
7. Hardy R, Cooper R, Aihie Sayer A, Ben-Shlomo Y, Cooper C et al. (2013) Body Mass Index, Muscle Strength and Physical Performance in Older Adults from Eight Cohort Studies: The HALCYon Programme. *Plos One* 8: e56483. doi: [10.1371/journal.pone.0056483](https://doi.org/10.1371/journal.pone.0056483) PMID: [23437142](https://pubmed.ncbi.nlm.nih.gov/23437142/)
8. Yang M, Ding X, Luo L, Hao Q, Dong B (2014) Disability Associated With Obesity, Dynapenia and Dynapenic-Obesity in Chinese Older Adults. *Journal of the American Medical Directors Association* 15: 150. doi: [10.1016/j.jamda.2013.10.004](https://doi.org/10.1016/j.jamda.2013.10.004) PMID: [24314698](https://pubmed.ncbi.nlm.nih.gov/24314698/)
9. Stenholm S, Harris TB, Rantanen T, Visser M, Kritchevsky SB et al. (2008) Sarcopenic obesity: definition, cause and consequences. *Current Opinion in Clinical Nutrition and Metabolic Care* 11: 693–700. doi: [10.1097/MCO.0b013e328312c37d](https://doi.org/10.1097/MCO.0b013e328312c37d) PMID: [18827572](https://pubmed.ncbi.nlm.nih.gov/18827572/)
10. Yassine HN, Marchetti CM, Krishnan RK, Vrobel TR, Gonzalez F et al. (2009) Effects of Exercise and Caloric Restriction on Insulin Resistance and Cardiometabolic Risk Factors in Older Obese Adults—a Randomized Clinical Trial. *The Journals of Gerontology Series A: Biological Sciences and Medical Sciences* 64A: 90–95.
11. Kim CJ, Park JW, Park HR (2013) Effects of a community-based intervention on cardio-metabolic risk and self-care behaviour in older adults with metabolic syndrome. *Int J Nurs Pract* 20: 212–220. doi: [10.1111/ijn.12139](https://doi.org/10.1111/ijn.12139) PMID: [24713018](https://pubmed.ncbi.nlm.nih.gov/24713018/)
12. Finucane FM, Sharp SJ, Purslow LR, Horton K, Horton J et al. (2010) The effects of aerobic exercise on metabolic risk, insulin sensitivity and intrahepatic lipid in healthy older people from the Hertfordshire Cohort Study: a randomised controlled trial. *Diabetologia* 53: 624–631. doi: [10.1007/s00125-009-1641-z](https://doi.org/10.1007/s00125-009-1641-z) PMID: [20052455](https://pubmed.ncbi.nlm.nih.gov/20052455/)
13. Peterson MD, Rhea MR, Sen A, Gordon PM (2010) Resistance exercise for muscular strength in older adults: A meta-analysis. *Ageing Research Reviews* 9: 226–237. doi: [10.1016/j.arr.2010.03.004](https://doi.org/10.1016/j.arr.2010.03.004) PMID: [20385254](https://pubmed.ncbi.nlm.nih.gov/20385254/)
14. Bann D, Kuh D, Wills AK, Adams J, Brage S et al. (2014) Physical activity across adulthood in relation to fat and lean mass in early old age: findings from the MRC National Survey of Health and Development, 1946–2010. *Am J Epidemiol* 179: 1197–1207. doi: [10.1093/aje/kwu033](https://doi.org/10.1093/aje/kwu033) PMID: [24722997](https://pubmed.ncbi.nlm.nih.gov/24722997/)
15. Dodds R, Kuh D, Aihie Sayer A, Cooper R (2013) Physical activity levels across adult life and grip strength in early old age: updating findings from a British birth cohort. *Age Ageing* 42: 794–798. doi: [10.1093/ageing/aft124](https://doi.org/10.1093/ageing/aft124) PMID: [23981980](https://pubmed.ncbi.nlm.nih.gov/23981980/)
16. Miller DK, Malmstrom TK, Miller JP, Andresen EM, Schootman M et al. (2010) Predictors of change in grip strength over 3 years in the African American health project. *J Aging Health* 22: 183–196. doi: [10.1177/0898264309355816](https://doi.org/10.1177/0898264309355816) PMID: [20051605](https://pubmed.ncbi.nlm.nih.gov/20051605/)
17. Stenholm S, Tiainen K, Rantanen T, Sainio P, Heliovaara M et al. (2012) Long-term determinants of muscle strength decline: prospective evidence from the 22-year mini-Finland follow-up survey. *J Am Geriatr Soc* 60: 77–85. doi: [10.1111/j.1532-5415.2011.03779.x](https://doi.org/10.1111/j.1532-5415.2011.03779.x) PMID: [22211568](https://pubmed.ncbi.nlm.nih.gov/22211568/)
18. Tikkanen P, Nykanen I, Lonroos E, Sipilä S, Sulkava R et al. (2012) Physical activity at age of 20–64 years and mobility and muscle strength in old age: a community-based study. *J Gerontol A Biol Sci Med Sci* 67: 905–910. doi: [10.1093/gerona/gls005](https://doi.org/10.1093/gerona/gls005) PMID: [22396477](https://pubmed.ncbi.nlm.nih.gov/22396477/)
19. Scott D, Blizzard L, Fell J, Jones G (2011) Prospective associations between ambulatory activity, body composition and muscle function in older adults. *Scand J Med Sci Sports* 21: 168–175.
20. Ekelund U, Besson H, Luan J, May AM, Sharp SJ et al. (2011) Physical activity and gain in abdominal adiposity and body weight: prospective cohort study in 288,498 men and women. *The American Journal of Clinical Nutrition* 93: 826–835. doi: [10.3945/ajcn.110.006593](https://doi.org/10.3945/ajcn.110.006593) PMID: [21346093](https://pubmed.ncbi.nlm.nih.gov/21346093/)
21. Manini TM, Everhart JE, Anton SD, Schoeller DA, Cummings SR et al. (2009) Activity energy expenditure and change in body composition in late life. *Am J Clin Nutr* 90: 1336–1342. doi: [10.3945/ajcn.2009.27659](https://doi.org/10.3945/ajcn.2009.27659) PMID: [19740971](https://pubmed.ncbi.nlm.nih.gov/19740971/)
22. Kowalski K, Rhodes R, Naylor PJ, Tuokko H, MacDonald S (2012) Direct and indirect measurement of physical activity in older adults: a systematic review of the literature. *International Journal of Behavioral Nutrition and Physical Activity* 9: 148. doi: [10.1186/1479-5868-9-148](https://doi.org/10.1186/1479-5868-9-148) PMID: [23245612](https://pubmed.ncbi.nlm.nih.gov/23245612/)
23. España-Romero V, Golubic R, Martin KR, Hardy R, Ekelund U et al. (2014) Comparison of the EPIC Physical Activity Questionnaire with Combined Heart Rate and Movement Sensing in a Nationally Representative Sample of Older British Adults. *Plos One* 9: e87085. doi: [10.1371/journal.pone.0087085](https://doi.org/10.1371/journal.pone.0087085) PMID: [24516543](https://pubmed.ncbi.nlm.nih.gov/24516543/)
24. Ainsworth BE, Haskell WL, Herrmann SD, Meckes N, Bassett DR Jr et al. (2011) 2011 Compendium of Physical Activities: a second update of codes and MET values. *Med Sci Sports Exerc* 43: 1575–1581. doi: [10.1249/MSS.0b013e31821ece12](https://doi.org/10.1249/MSS.0b013e31821ece12) PMID: [21681120](https://pubmed.ncbi.nlm.nih.gov/21681120/)

25. Thorp AA, Owen N, Neuhaus M, Dunstan DW (2011) Sedentary Behaviors and Subsequent Health Outcomes in Adults: A Systematic Review of Longitudinal Studies, 1996–2011. *Am J Prev Med* 41: 207–215. doi: [10.1016/j.amepre.2011.05.004](https://doi.org/10.1016/j.amepre.2011.05.004) PMID: [21767729](https://pubmed.ncbi.nlm.nih.gov/21767729/)
26. Ford ES, Caspersen CJ (2012) Sedentary behaviour and cardiovascular disease: a review of prospective studies. *Int J Epidemiol* 41: 1338–1353. doi: [10.1093/ije/dys078](https://doi.org/10.1093/ije/dys078) PMID: [22634869](https://pubmed.ncbi.nlm.nih.gov/22634869/)
27. The Sedentary Behaviour and Obesity Expert Working Group (2011) Sedentary Behaviour and Obesity: Review of the Current Scientific Evidence.
28. Pulsford RM, Stamatakis E, Britton AR, Brunner EJ, Hillsdon MM (2013) Sitting Behavior and Obesity: Evidence from the Whitehall II Study. *Am J Prev Med* 44: 132–138. doi: [10.1016/j.amepre.2012.10.009](https://doi.org/10.1016/j.amepre.2012.10.009) PMID: [23332328](https://pubmed.ncbi.nlm.nih.gov/23332328/)
29. Hamer M, Stamatakis E (2013) Screen-Based Sedentary Behavior, Physical Activity, and Muscle Strength in the English Longitudinal Study of Ageing. *Plos One* 8: e66222. doi: [10.1371/journal.pone.0066222](https://doi.org/10.1371/journal.pone.0066222) PMID: [23755302](https://pubmed.ncbi.nlm.nih.gov/23755302/)
30. Matthews CE, Chen KY, Freedson PS, Buchowski MS, Beech BM et al. (2008) Amount of Time Spent in Sedentary Behaviors in the United States, 2003–2004. *Am J Epidemiol* 167: 875–881. doi: [10.1093/aje/kwm390](https://doi.org/10.1093/aje/kwm390) PMID: [18303006](https://pubmed.ncbi.nlm.nih.gov/18303006/)
31. Fielding RA, Rejeski WJ, Blair S, Church T, Espeland MA et al. (2011) The Lifestyle Interventions and Independence for Elders Study: Design and Methods. *Journals of Gerontology Series A-Biological Sciences and Medical Sciences* 66: 1226–1237. doi: [10.1093/gerona/glr123](https://doi.org/10.1093/gerona/glr123) PMID: [21825283](https://pubmed.ncbi.nlm.nih.gov/21825283/)
32. Marsh AP, Lovato LC, Glynn NW, Kennedy K, Castro C et al. (2013) Lifestyle Interventions and Independence for Elders Study: Recruitment and Baseline Characteristics. *The Journals of Gerontology Series A: Biological Sciences and Medical Sciences* 68: 1549–1558. doi: [10.1093/gerona/glt064](https://doi.org/10.1093/gerona/glt064) PMID: [23716501](https://pubmed.ncbi.nlm.nih.gov/23716501/)
33. Choi L, Liu Z, Matthews CE, Buchowski MS (2011) Validation of accelerometer wear and nonwear time classification algorithm. *Med Sci Sports Exerc* 43: 357–364. doi: [10.1249/MSS.0b013e3181ed61a3](https://doi.org/10.1249/MSS.0b013e3181ed61a3) PMID: [20581716](https://pubmed.ncbi.nlm.nih.gov/20581716/)
34. Copeland JL, Eslinger DW (2009) Accelerometer Assessment of Physical Activity in Active, Healthy Older Adults. *Journal of Aging and Physical Activity* 17: 17–30. PMID: [19299836](https://pubmed.ncbi.nlm.nih.gov/19299836/)
35. Strath SJ, Pfeiffer KA, Whitt-Glover MC (2012) Accelerometer Use with Children, Older Adults, and Adults with Functional Limitations. *Med Sci Sports Exerc* 44: S77–S85. doi: [10.1249/MSS.0b013e3182399eb1](https://doi.org/10.1249/MSS.0b013e3182399eb1) PMID: [22157778](https://pubmed.ncbi.nlm.nih.gov/22157778/)
36. Buman MP, Hekler EB, Haskell WL, Pruitt L, Conway TL et al. (2010) Objective Light-Intensity Physical Activity Associations With Rated Health in Older Adults. *Am J Epidemiol* 172: 1155–1165. doi: [10.1093/aje/kwq249](https://doi.org/10.1093/aje/kwq249) PMID: [20843864](https://pubmed.ncbi.nlm.nih.gov/20843864/)
37. Stewart AL, Mills KM, King AC, Haskell WL, Gillis DAWN et al. (2001) CHAMPS Physical Activity Questionnaire for Older Adults: outcomes for interventions. *Medicine & Science in Sports & Exercise* 33: 1126–1141. doi: [10.3855/jdc.5778](https://doi.org/10.3855/jdc.5778) PMID: [25596616](https://pubmed.ncbi.nlm.nih.gov/25596616/)
38. Sedentary Behaviour RN (2012) Letter to the editor: standardized use of the terms “sedentary” and “sedentary behaviours”. *Appl Physiol Nutr Metab* 37: 540–542. doi: [10.1139/h2012-024](https://doi.org/10.1139/h2012-024) PMID: [22540258](https://pubmed.ncbi.nlm.nih.gov/22540258/)
39. Hekler EB, Buman MP, Haskell WL, Conway TL, Cain KL et al. (2012) Reliability and Validity of CHAMPS Self-Reported Sedentary-to-Vigorous Intensity Physical Activity in Older Adults. *Journal of Physical Activity & Health* 9: 225–236. doi: [10.1016/j.neulet.2015.01.031](https://doi.org/10.1016/j.neulet.2015.01.031) PMID: [25596588](https://pubmed.ncbi.nlm.nih.gov/25596588/)
40. Cooper R, Mishra GD, Kuh D (2011) Physical Activity Across Adulthood and Physical Performance in Midlife: Findings from a British Birth Cohort. *Am J Prev Med* 41: 376–384. doi: [10.1016/j.amepre.2011.06.035](https://doi.org/10.1016/j.amepre.2011.06.035) PMID: [21961464](https://pubmed.ncbi.nlm.nih.gov/21961464/)
41. Flegal KM, Shepherd JA, Looker AC, Graubard BI, Borrud LG et al. (2009) Comparisons of percentage body fat, body mass index, waist circumference, and waist-stature ratio in adults. *The American Journal of Clinical Nutrition* 89: 500–508. doi: [10.3945/ajcn.2008.26847](https://doi.org/10.3945/ajcn.2008.26847) PMID: [19116329](https://pubmed.ncbi.nlm.nih.gov/19116329/)
42. Harris JL, Pomeranz JL, Lobstein T, Brownell KD (2009) A Crisis in the Marketplace: How Food Marketing Contributes to Childhood Obesity and What Can Be Done. *Annu Rev Public Health* 30: 211–225. doi: [10.1146/annurev.publhealth.031308.100304](https://doi.org/10.1146/annurev.publhealth.031308.100304) PMID: [18976142](https://pubmed.ncbi.nlm.nih.gov/18976142/)
43. Wells JCK, Marphatia AA, Cole TJ, McCoy D (2012) Associations of economic and gender inequality with global obesity prevalence: Understanding the female excess. *Social Science & Medicine* 75: 482–490. doi: [10.1016/j.socscimed.2015.01.005](https://doi.org/10.1016/j.socscimed.2015.01.005) PMID: [25596612](https://pubmed.ncbi.nlm.nih.gov/25596612/)
44. Hoyenga KB, Hoyenga KT (1982) Gender and energy balance: sex differences in adaptations for feast and famine. *Physiol Behav* 28: 545–563. PMID: [7043508](https://pubmed.ncbi.nlm.nih.gov/7043508/)
45. Hagobian T, Evero N (2013) Exercise and Weight Loss: What Is the Evidence of Sex Differences? *Curr Obes Rep* 2: 86–92.

46. Donnelly JE, Honas JJ, Smith BK, Mayo MS, Gibson CA et al. (2013) Aerobic exercise alone results in clinically significant weight loss for men and women: midwest exercise trial 2. *Obesity (Silver Spring)* 21: E219–E228. doi: [10.1002/oby.20145](https://doi.org/10.1002/oby.20145) PMID: [23592678](https://pubmed.ncbi.nlm.nih.gov/23592678/)
47. Crane JD, MacNeil LG, Tarnopolsky MA (2013) Long-term aerobic exercise is associated with greater muscle strength throughout the life span. *The Journals of Gerontology Series A: Biological Sciences and Medical Sciences* 68: 631–638. doi: [10.1093/gerona/gls237](https://doi.org/10.1093/gerona/gls237) PMID: [23213030](https://pubmed.ncbi.nlm.nih.gov/23213030/)
48. Konopka AR, Harber MP (2014) Skeletal Muscle Hypertrophy After Aerobic Exercise Training. *Exerc Sport Sci Rev* 42. doi: [10.1249/JES.0000000000000028](https://doi.org/10.1249/JES.0000000000000028) PMID: [25185448](https://pubmed.ncbi.nlm.nih.gov/25185448/)
49. Hutcheon JA, Chioloro A, Hanley JA (2010) Random measurement error and regression dilution bias. *BMJ* 340: c2289. doi: [10.1136/bmj.c2289](https://doi.org/10.1136/bmj.c2289) PMID: [20573762](https://pubmed.ncbi.nlm.nih.gov/20573762/)
50. Park H, Park S, Shephard RJ, Aoyagi Y (2010) Yearlong physical activity and sarcopenia in older adults: the Nakanojo Study. *European Journal of Applied Physiology* 109: 953–961. doi: [10.1007/s00421-010-1424-8](https://doi.org/10.1007/s00421-010-1424-8) PMID: [20336310](https://pubmed.ncbi.nlm.nih.gov/20336310/)
51. Newton RL, Han H, Zderic T, Hamilton M (2013) The Energy Expenditure of Sedentary Behavior: A Whole Room Calorimeter Study. *Plos One* 8: e63171. doi: [10.1371/journal.pone.0063171](https://doi.org/10.1371/journal.pone.0063171) PMID: [23658805](https://pubmed.ncbi.nlm.nih.gov/23658805/)
52. Goldman SE, Hall M, Boudreau R, Matthews KA, Cauley JA et al. (2008) Association between nighttime sleep and napping in older adults. *Sleep* 31: 733–740. PMID: [18517043](https://pubmed.ncbi.nlm.nih.gov/18517043/)
53. van der Bij AK, Laurant MGH, Wensing M (2002) Effectiveness of physical activity interventions for older adults: a review. *Am J Prev Med* 22: 120–133. PMID: [11818183](https://pubmed.ncbi.nlm.nih.gov/11818183/)
